# Supplementary material for: Insights into the Neuroprotective Potential of Epicatechin: Effects against Aβ-Induced Toxicity in Caenorhabditis elegans
Source: MDPI journal article supplement (doi:10.3390/antiox13010079), 2024-01-08
Supplement: s1 [file s1]

**Table S1:** Oligonucleotide primers used in qRT-PCR studies.

| Gene            | Forward (5'-3')          | Reverse (5'-3')        | Accession number | References                    |
|-----------------|--------------------------|------------------------|------------------|-------------------------------|
| <i>act-1</i>    | CCAGGAATTGCTGATCGTATG    | GGAGAGGGAAGCGAGGATAG   | NM_073418.9      | [29]                          |
| <i>vha-5</i>    | CTTCATGGAAACGCGACTGT     | CGGTAACGAACACCATGTGC   | NM_068998.10     | [30]                          |
| <i>cpr-5</i>    | CTCCGACGCTATTCCAGACC     | GCGTAGGCGGTAGATCCAAA   | NM_070982.7      | [30]                          |
| <i>epg-8</i>    | GCGGTAAACGCTACACAAAGA    | CCATCCGCTGAGATTCCTGG   | NM_170914.6      | [30]                          |
| <i>ced-7</i>    | GAAGTGGCAGATTCCGAAAGA    | TCAAGGGAGGACTGAGCTAATA | NM_001026054.4   | Designed by the research team |
| ZC239.12        | CCAGAAGAATCCCCATACGA     | TCCTCCTCCAACTTTTCCAAA  | NM_062072.3      | [31]                          |
| <i>hsp-16.2</i> | CTGCAGAATCTCTCCATCTGAGTC | AGATTCTGAAGCAACTGCACC  | NM_071106.8      | [32]                          |
| <i>hsp-70</i>   | CAAGACTTTGGAGCCGGTTG     | GGAGCAGTTGAGGTCCTTCCC  | NM_060084.6      | [30]                          |
